# Supplementary material for: Neutralizing antibodies against SARS-CoV-2 variants following mRNA booster vaccination in adults older than 65 years
Source: Springer Nature journal article supplement (doi:10.1038/s41598-022-24409-w), 2022-11-27
Supplement: MOESM1 [file 41598_2022_24409_MOESM1_ESM.pdf]

Supplementary Table 1: Characteristics of the population

|                                                    | SARS-CoV-2 naïve                           |                                           | p-value             | SARS-CoV-2<br>infected before<br>the primary<br>vaccination |
|----------------------------------------------------|--------------------------------------------|-------------------------------------------|---------------------|-------------------------------------------------------------|
|                                                    | CoviCompareM<br>(M)<br>mRNA-1273<br>N = 34 | CoviCompareP<br>(P)<br>BNT162b2<br>N = 19 |                     | CoviCompareP<br>(P2)<br>BNT162b2<br>N = 12                  |
| Age (years)                                        | 71.5 [68.2, 76.0]<br>(66 to 84)            | 72.0 [66.5, 75.5]<br>(65 to 84)           | 0.56 <sup>1</sup>   | 70.0 [67.0, 75.0]<br>(65 to 81)                             |
| Male sex                                           | 20 (59%)                                   | 8 (42%)                                   | 0.24 <sup>2</sup>   | 8 (67%)                                                     |
| Body Mass Index<br>(BMI)                           | 25.3 [22.6, 27.6]                          | 24.7 [22.3, 26.6]                         | 0.48 <sup>1</sup>   | 24.0 [20.7, 25.0]                                           |
| BMI > 30                                           | 5 (15%)                                    | 0 (0%)                                    | 0.15 <sup>3</sup>   | 0 (0%)                                                      |
| Months between<br>primary vaccination<br>and boost | 7.4 [7.0, 7.5]                             | 6.8 [6.4, 7.0]                            | <0.001 <sup>1</sup> | 7.8 [7.5, 7.9]                                              |
| 3 days after boost, <i>days</i>                    | 4 (2 to 6)                                 | 3 (2 to 5)                                | 0.12 <sup>1</sup>   | 3 (2 to 4)                                                  |
| 15 days after boost, <i>days</i>                   | 15 (12 to 17)                              | 14 (13 to 20)                             | 0.25 <sup>1</sup>   | 14 (14 to 17)                                               |
| 28 days after boost, n<br><i>days</i>              | 12<br>28 (26 to 29)                        | 11<br>28 (25 to 28)                       | 0.26 <sup>1</sup>   | 5<br>28 (27 to 28)                                          |

n (%); Median [IQR] (min to max)

<sup>1</sup>Wilcoxon rank sum test <sup>2</sup>Pearson's Chi-squared test <sup>3</sup>Fisher's exact test

Supplementary Table 2: **Geometric means (MMRM model estimates)**

Individual profiles are connected with grey lines and model-based geometric means estimates with 95% confidence intervals are connected with black lines at Day 0=before boost, 3, 15, 28 days after boost



**European strain (neutralization titer)**

| Timepoint               | CoviCompare-M mRNA-1273 SARS-CoV-2 naïve (M) N=34 | CoviCompare-P BNT162b2 SARS-CoV-2 naïve (P) N=19 | CoviCompare-P BNT162b2 previously SARS CoV-2 infected (P2) N=12 |
|-------------------------|---------------------------------------------------|--------------------------------------------------|-----------------------------------------------------------------|
| Before boost (Day 0), n | 33                                                | 18                                               | 12                                                              |
| <b>Geometric mean</b>   | <b>83.63</b>                                      | <b>40.08</b>                                     | <b>2317.65</b>                                                  |
| 95%CI                   | 56.79, 123.17                                     | 23.99, 66.96                                     | 1212.41, 4430.42                                                |
| Day 3, n                | 34                                                | 18                                               | 12                                                              |
| <b>Geometric mean</b>   | <b>162.30</b>                                     | <b>55.66</b>                                     | <b>2392.06</b>                                                  |
| 95%CI                   | 95.68, 275.32                                     | 27.46, 112.81                                    | 937.77, 6101.66                                                 |
| Day 15, n               | 34                                                | 19                                               | 12                                                              |
| <b>Geometric mean</b>   | <b>2251.43</b>                                    | <b>890.57</b>                                    | <b>4375.14</b>                                                  |
| 95%CI                   | 1692.60, 2994.74                                  | 608.61, 1303.14                                  | 2701.65, 7085.25                                                |
| Day 28, n               | 12                                                | 11                                               | 5                                                               |
| <b>Geometric mean</b>   | <b>2828.78</b>                                    | <b>883.94</b>                                    | <b>4878.70</b>                                                  |
| 95%CI                   | 1753.91, 4562.38                                  | 523.47, 1492.62                                  | 2302.26, 10338.41                                               |

### Delta variant (neutralization titer)

| Timepoint               | CoviCompare-M<br>mRNA-1273<br>SARS-CoV-2<br>naïve (M)<br>N=34 | CoviCompare-P<br>BNT162b2<br>SARS-CoV-2<br>naïve (P)<br>N=19 | CoviCompare-P<br>BNT162b2<br>previously SARS<br>CoV-2 infected (P2)<br>N=12 |
|-------------------------|---------------------------------------------------------------|--------------------------------------------------------------|-----------------------------------------------------------------------------|
| Before boost (Day 0), n | 33                                                            | 19                                                           | 12                                                                          |
| <b>Geometric mean</b>   | <b>42.06</b>                                                  | <b>33.31</b>                                                 | <b>1135.41</b>                                                              |
| 95%CI                   | 28.68, 61.70                                                  | 20.06, 55.32                                                 | 598.24, 2154.94                                                             |
| Day 3, n                | 34                                                            | 19                                                           | 12                                                                          |
| <b>Geometric mean</b>   | <b>78.52</b>                                                  | <b>38.55</b>                                                 | <b>1350.24</b>                                                              |
| 95%CI                   | 47.59, 129.56                                                 | 19.74, 75.27                                                 | 580.60, 3140.14                                                             |
| Day 15, n               | 34                                                            | 19                                                           | 12                                                                          |
| <b>Geometric mean</b>   | <b>944.41</b>                                                 | <b>616.76</b>                                                | <b>3031.19</b>                                                              |
| 95%CI                   | 688.45, 1295.52                                               | 404.55, 940.31                                               | 1777.21, 5169.96                                                            |
| Day 28, n               | 12                                                            | 12                                                           | 5                                                                           |
| <b>Geometric mean</b>   | <b>1217.55</b>                                                | <b>558.93</b>                                                | <b>2228.93</b>                                                              |
| 95%CI                   | 659.30, 2248.47                                               | 277.66, 1125.13                                              | 838.54, 5924.74                                                             |

### Omicron BA.1 variant (neutralization titer)

| Timepoint               | CoviCompare-M<br>mRNA-1273<br>SARS-CoV-2<br>naïve (M)<br>N=34 | CoviCompare-P<br>BNT162b2<br>SARS-CoV-2<br>naïve (P)<br>N=19 | CoviCompare-P<br>BNT162b2<br>previously SARS<br>CoV-2 infected (P2)<br>N=12 |
|-------------------------|---------------------------------------------------------------|--------------------------------------------------------------|-----------------------------------------------------------------------------|
| Before boost (Day 0), n | 33                                                            | 19                                                           | 12                                                                          |
| <b>Geometric mean</b>   | <b>13.82</b>                                                  | <b>12.45</b>                                                 | <b>119.95</b>                                                               |
| 95%CI                   | 10.80, 17.69                                                  | 8.99, 17.24                                                  | 79.40, 181.23                                                               |
| Day 3, n                | 34                                                            | 19                                                           | 12                                                                          |
| <b>Geometric mean</b>   | <b>22.60</b>                                                  | <b>14.40</b>                                                 | <b>151.13</b>                                                               |
| 95%CI                   | 16.10, 31.70                                                  | 9.16, 22.64                                                  | 85.38, 267.51                                                               |
| Day 15, n               | 34                                                            | 19                                                           | 12                                                                          |
| <b>Geometric mean</b>   | <b>173.54</b>                                                 | <b>92.58</b>                                                 | <b>320.23</b>                                                               |
| 95%CI                   | 124.35, 242.20                                                | 59.31, 144.51                                                | 182.53, 561.82                                                              |
| Day 28, n               | 12                                                            | 12                                                           | 5                                                                           |
| <b>Geometric mean</b>   | <b>169.49</b>                                                 | <b>99.78</b>                                                 | <b>319.78</b>                                                               |
| 95%CI                   | 105.79, 271.56                                                | 57.40, 173.44                                                | 149.93, 682.03                                                              |

### Anti-spike IgG (BAU/mL)

| Timepoint                | CoviCompare-M<br>mRNA-1273<br>SARS-CoV-2<br>naïve (M)<br>N=34 | CoviCompare-P<br>BNT162b2<br>SARS-CoV-2<br>naïve (P)<br>N=19 | CoviCompare-P<br>BNT162b2<br>previously SARS<br>CoV-2 infected (P2)<br>N=12 |
|--------------------------|---------------------------------------------------------------|--------------------------------------------------------------|-----------------------------------------------------------------------------|
| Before boost (Day 0), n  | 33                                                            | 18                                                           | 12                                                                          |
| <b>Geometric mean</b>    | <b>195.77</b>                                                 | <b>132.24</b>                                                | <b>1637.59</b>                                                              |
| 95%CI                    | 145.60, 263.21                                                | 88.46, 197.67                                                | 997.00, 2689.76                                                             |
| Day 3, n                 | 34                                                            | 18                                                           | 12                                                                          |
| <b>Geometric mean, n</b> | <b>311.72</b>                                                 | <b>166.85</b>                                                | <b>1553.70</b>                                                              |
| 95%CI                    | 209.35, 464.13                                                | 96.75, 287.74                                                | 794.51, 3038.32                                                             |
| Day 15, n                | 34                                                            | 19                                                           | 12                                                                          |
| <b>Geometric mean</b>    | <b>3272.47</b>                                                | <b>2121.77</b>                                               | <b>3319.86</b>                                                              |
| 95%CI                    | 2604.99, 4110.96                                              | 1565.07, 2876.50                                             | 2258.85, 4879.25                                                            |
| Day 28, n                | 12                                                            | 11                                                           | 5                                                                           |
| <b>Geometric mean</b>    | <b>3813.58</b>                                                | <b>2057.77</b>                                               | <b>2793.87</b>                                                              |
| 95%CI                    | 3003.65, 4841.90                                              | 1532.71, 2762.69                                             | 1890.07, 4129.84                                                            |

Supplementary Figure 1: **Geometric means and 95% Confidence Intervals (MMRM model estimates) for participants with 2-4 days post boost only (n=48)**

Neutralizing antibody titers for European strain, Delta, Omicron (BA.1) variants and anti-spike IgG (BAU/mL) in SARS-CoV-2 naïve mRNA-1273 recipients (M in blue), BNT162b2 recipients (P in red) and previously SARS-CoV-2 infected BNT162b2 recipients (P2 in green) before booster dose (day 0) and at 3, 15 and 28 days after boost.

Timepoints comparisons: significant p-values within each group are shown (<.05)

M vs P comparisons: p-values at each timepoint below the figures



\* no time effect slice (in P2)  
 \*\* no group effect slice (at D15 and D28)

Supplementary Figure 2: **Neutralizing antibody titers for European strain, Delta, Omicron (BA.1) variants against the age at the first dose of vaccine (years) in SARS-CoV-2 naïve mRNA-1273 recipients (M in blue), BNT162b2 recipients (P in red) and previously SARS-CoV-2 infected BNT162b2 recipients (P2 in green) before booster dose and days 3, 15 and 28 after boost. Regression slopes and Spearman correlations are not statistically significant.**



Supplementary Figure 3: Neutralizing antibody titers for European strain, Delta, Omicron (BA.1) variants at D1 (1<sup>st</sup> dose) ; D29 (28 days after 1<sup>st</sup> dose and 2<sup>nd</sup> dose in SARS-CoV-2 naïve); D57 (28 days after 2<sup>nd</sup> dose). SARS-CoV-2 naïve mRNA-1273 recipients (M in blue), BNT162b2 recipients (P in red) and previously SARS-CoV-2 infected BNT162b2 recipients (P2 in green). Sample sizes (N) and medians are indicated at the bottom and p-values are for paired signed rank tests between D15 post-boost and D28 post primary-vaccination when n>5. Black triangles show administration of vaccine.
